# Supplementary material
Source: publisher figshare collection journal article supplement (https://tandf.figshare.com/articles/dataset/_/1004987)

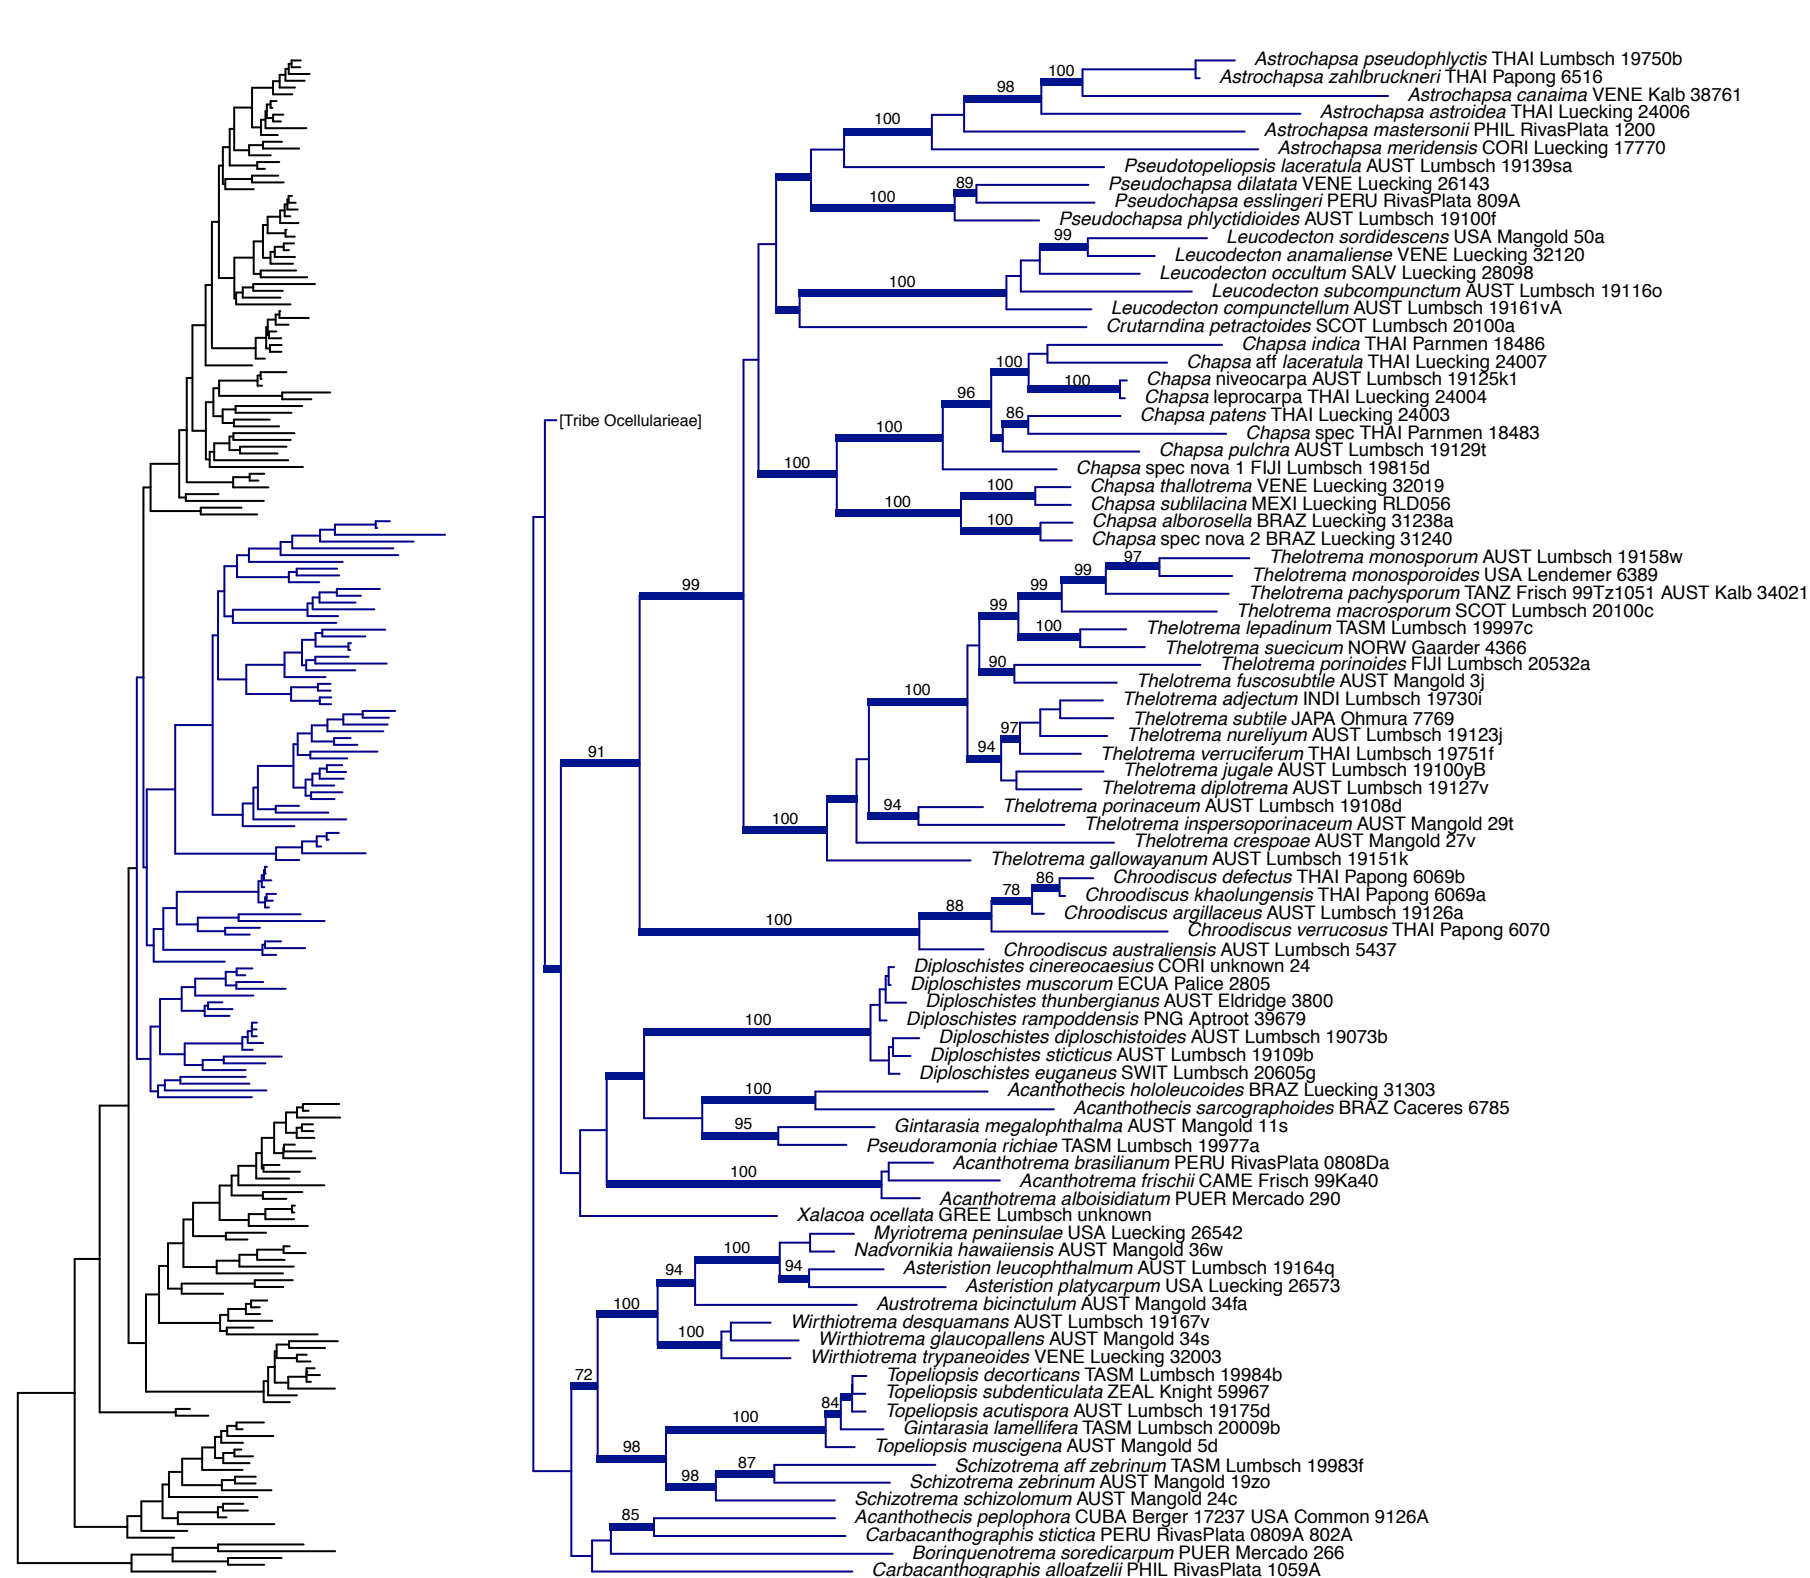

Supplement: Supplementary file 1 [file 2]

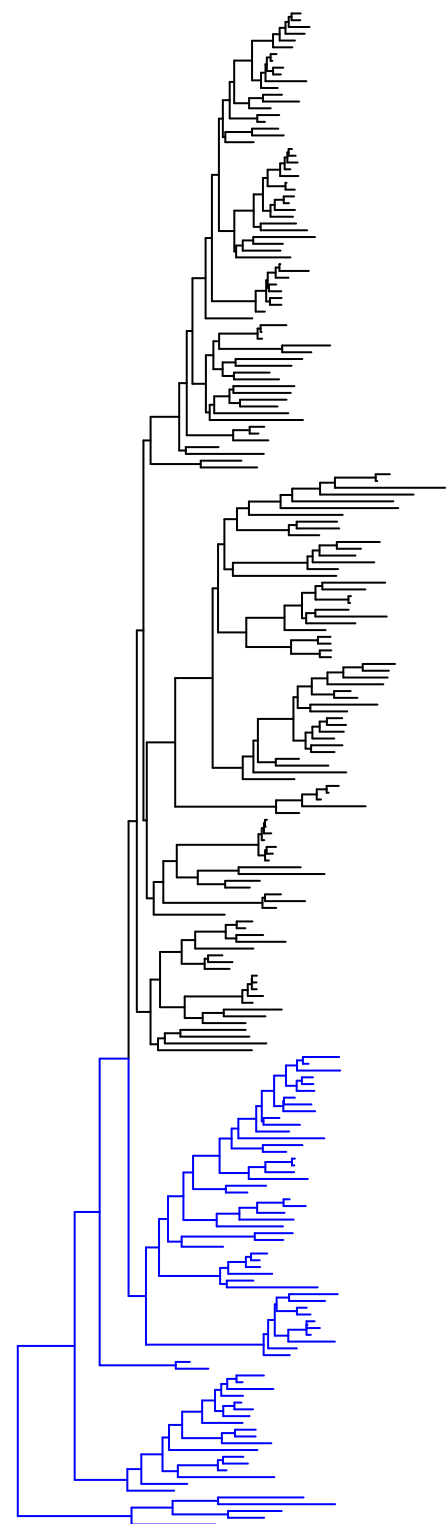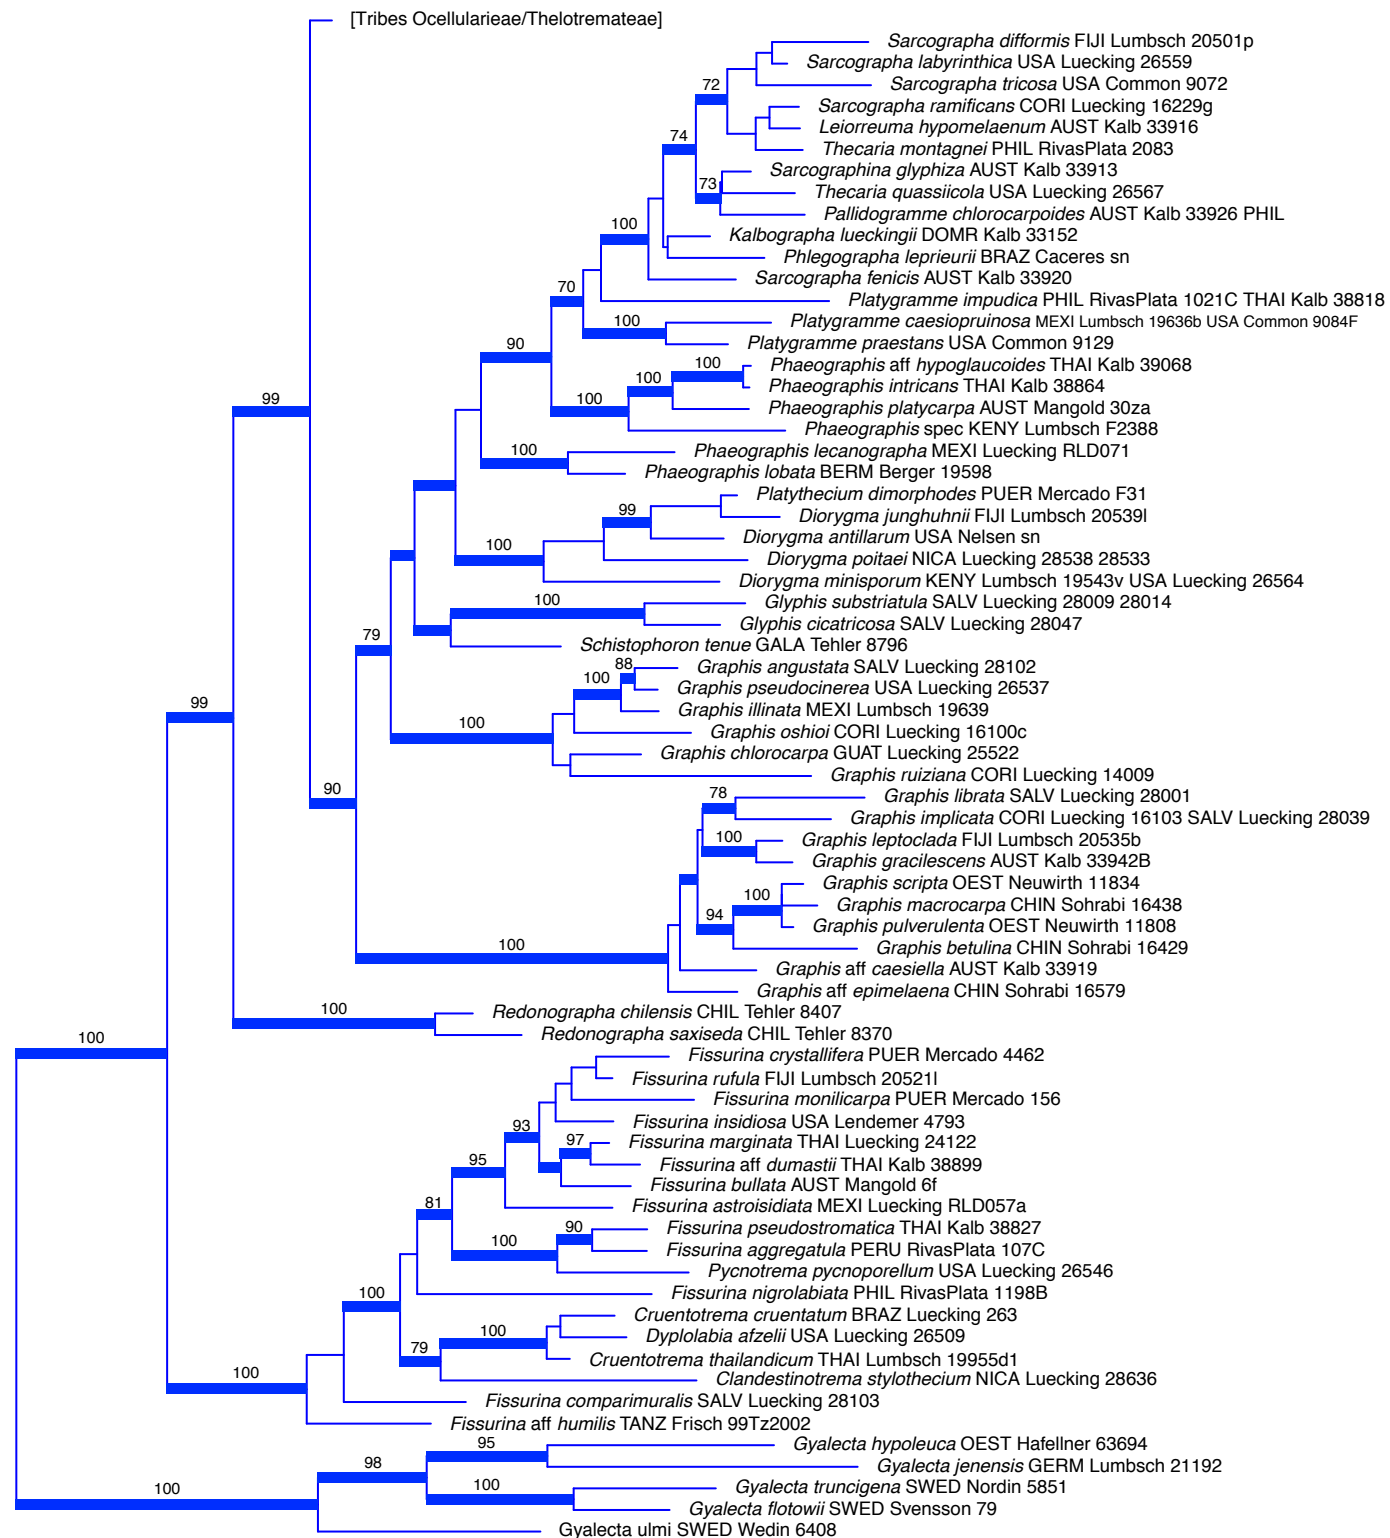

Supplement: Supplementary file 2 [file 2]

Photobiont

- trentepohlioid
- chlorococcoid

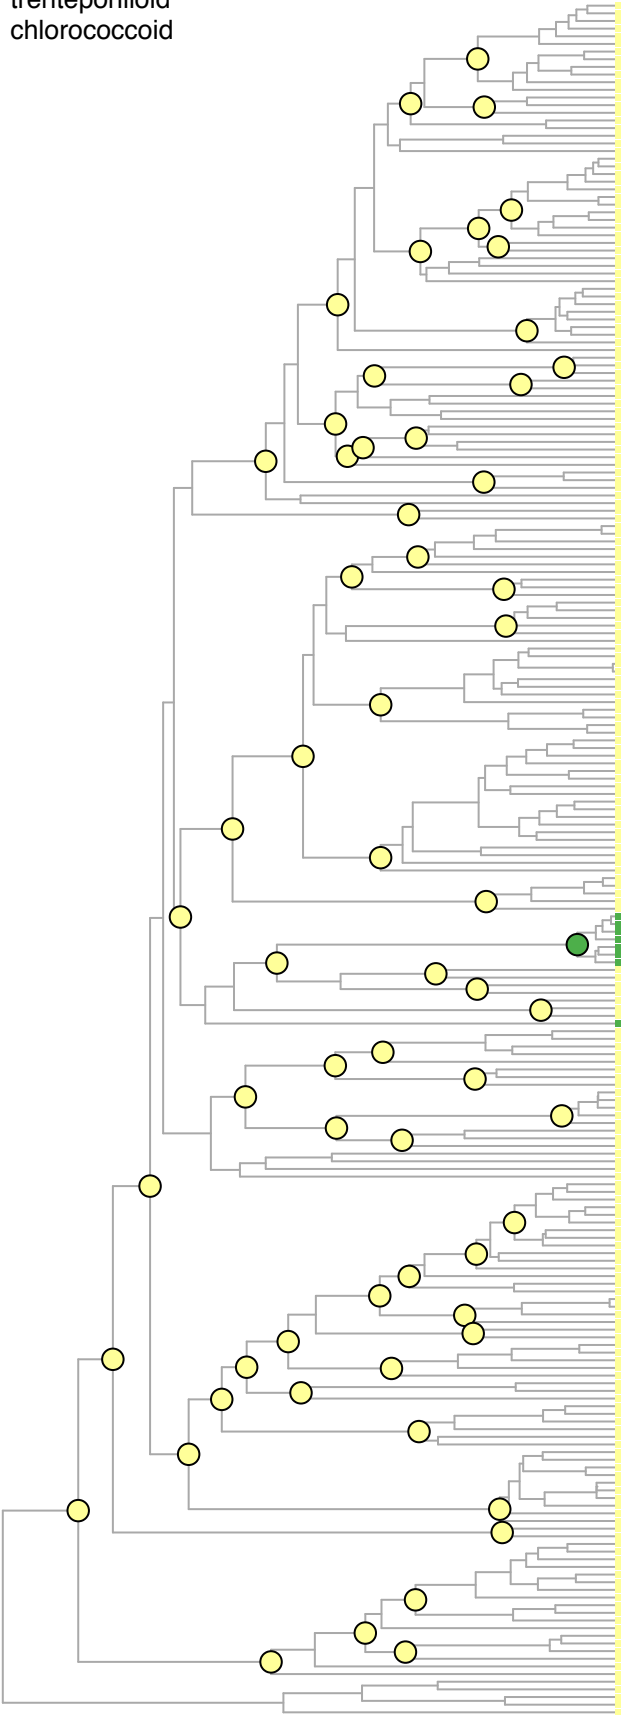

*Diploschistes*

Supplement: Supplementary file 3 [file 2]

Ascoma aggregation

- solitary
- pseudostromatic

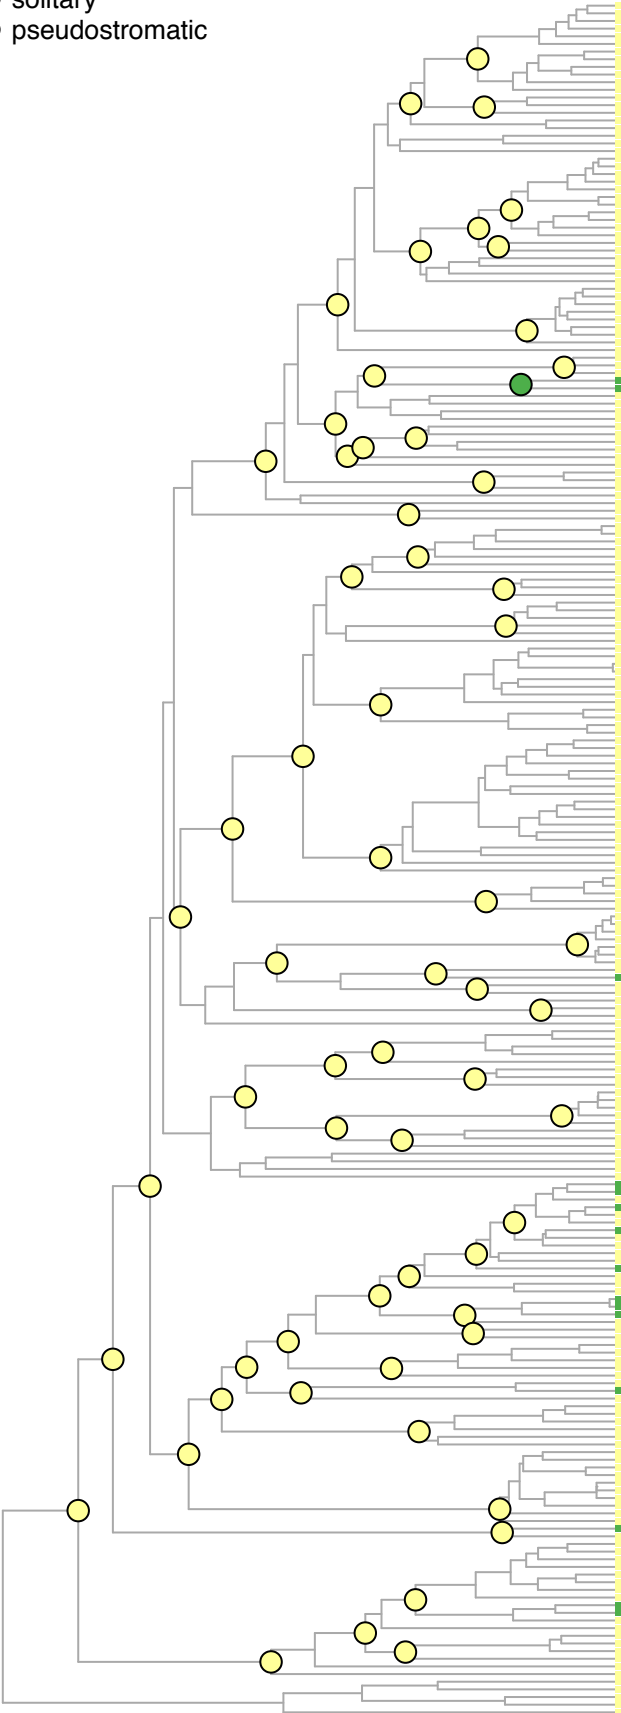

*Compositrema*

Supplement: Supplementary file 4 [file 2]

Ascoma persistence

- persistent
- mazaediod

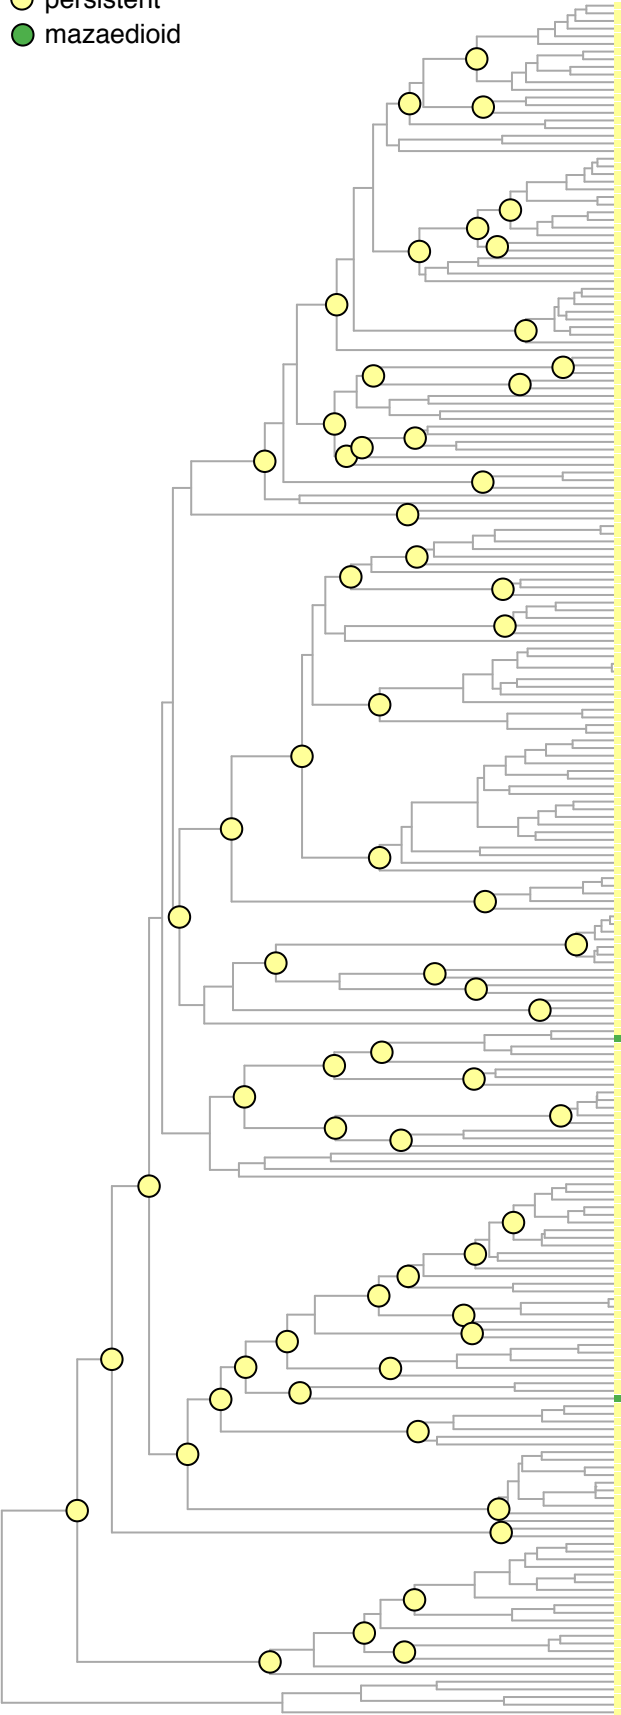

Supplement: Supplementary file 5 [file 2]

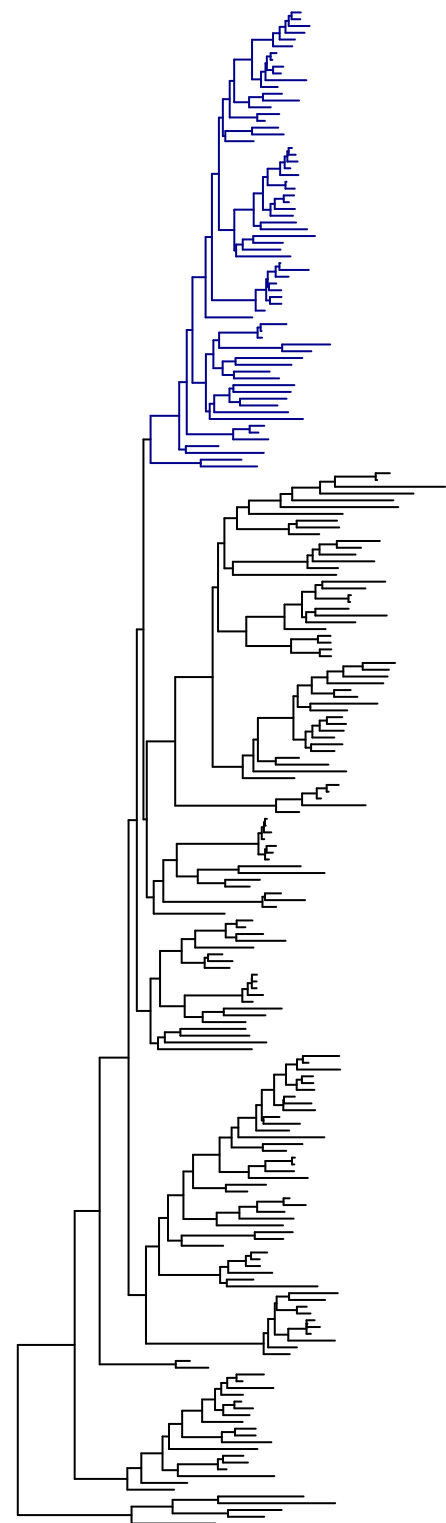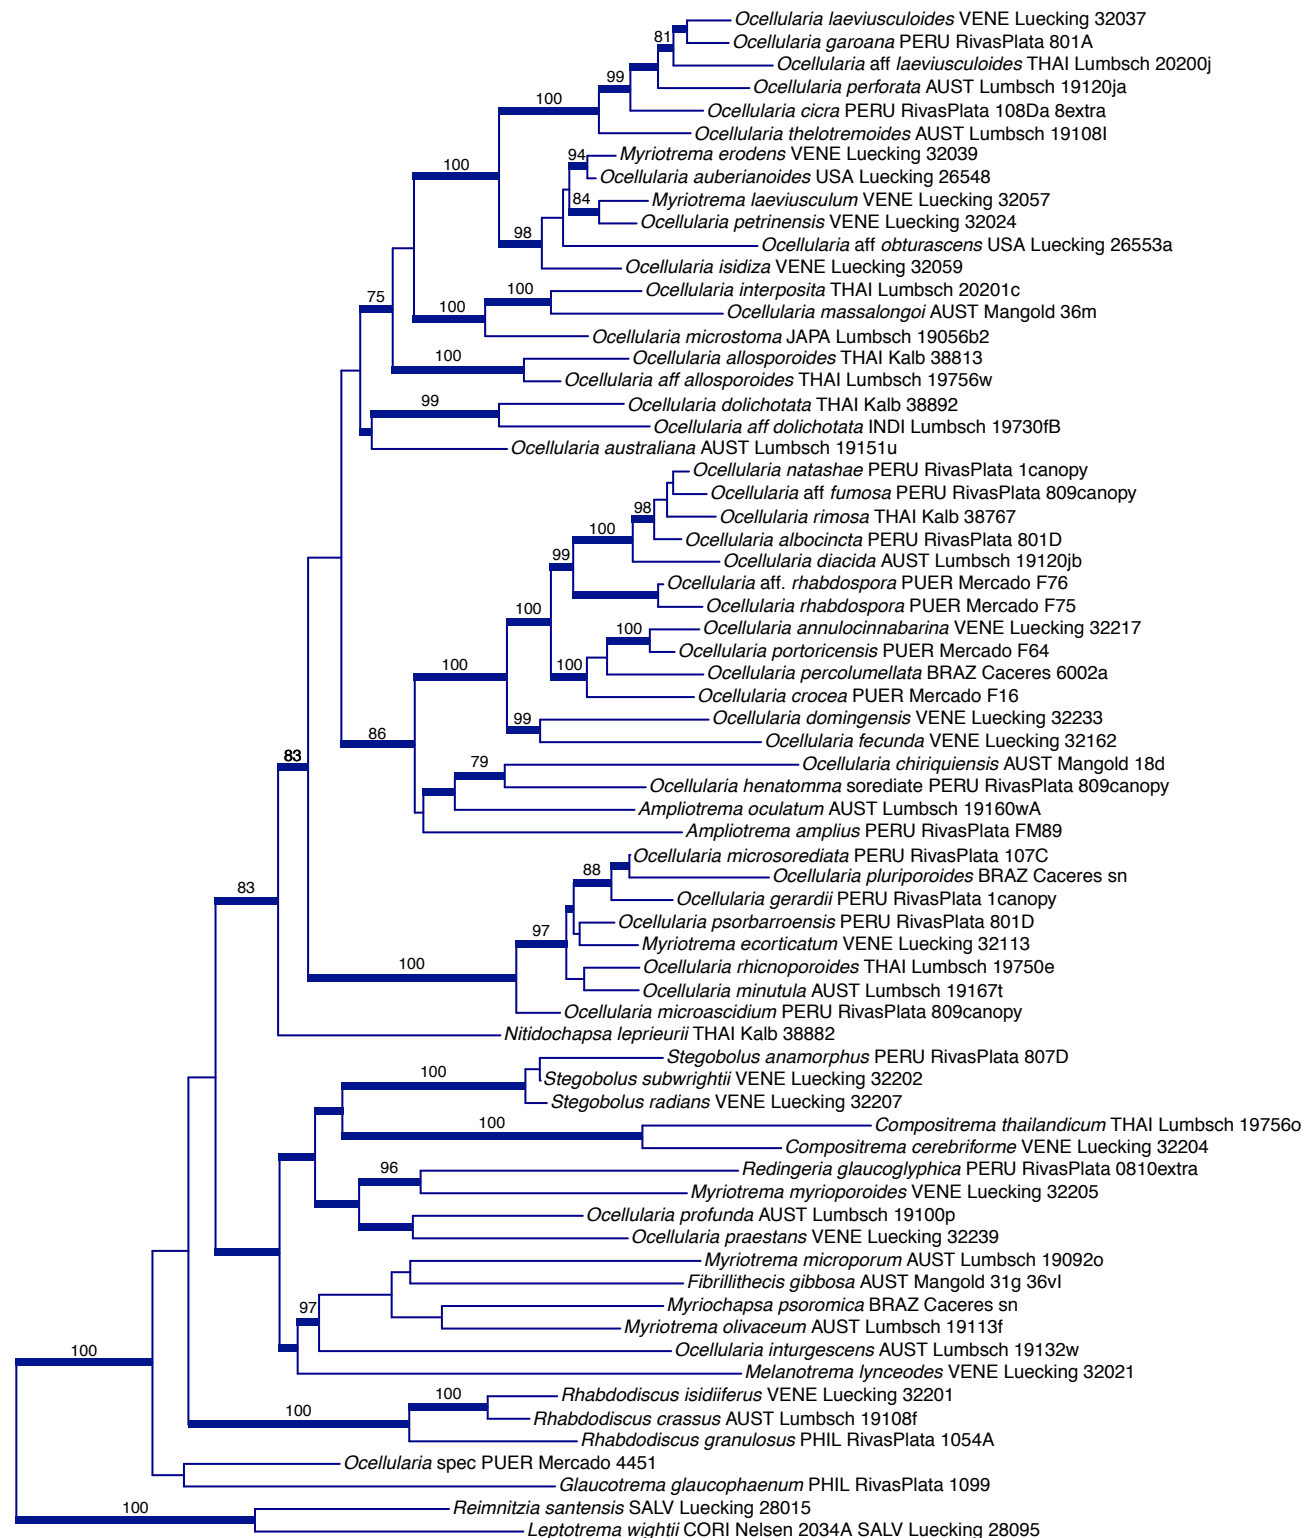

Supplement: Supplementary file 6 [file 2]
